# Supplementary material for: Benzothiadiazole-based fluorophores as efficient non-doped emitters for solution-processed organic light-emitting diodes
Source: Royal Society of Chemistry journal article supplement (doi:10.1039/d2nj04354h), 2022-01-01

## Supporting information

### Benzothiadiazole-based fluorophores as efficient non-doped emitters for solution-processed organic light-emitting diodes

Taweesak Sudyoadsuk<sup>1</sup>, Patteera Funchien<sup>1</sup>, Sujinda Petdee<sup>1</sup>, Thidarat Loythaworn<sup>1</sup>, Pongsakorn Chasing<sup>1</sup>, Wijitra Waengdongbung,<sup>2</sup> Atthapon Saenubol,<sup>1</sup> Sarinya Hadsadee,<sup>3</sup> Siriporn Jungsuttiwong,<sup>3</sup> Vinich Promarak<sup>1,2\*</sup>

<sup>1</sup>*Department of Materials Science and Engineering, School of Molecular Science and Engineering, Vidyasirimedhi Institute of Science and Technology, Wangchan, Rayong 21210, Thailand*

<sup>2</sup>*Research Network of NANOTEC-VISTEC on Nanotechnology for Energy, School of Molecular Science and Engineering, Vidyasirimedhi Institute of Science and Technology, Wangchan, Rayong 21210, Thailand*

<sup>3</sup>*Department of Chemistry, Faculty of Science, Ubon Ratchathani University, Warinchumrap, Ubon Ratchathani 34190, Thailand*

\*Email: [vinich.p@vistec.ac.th](mailto:vinich.p@vistec.ac.th)

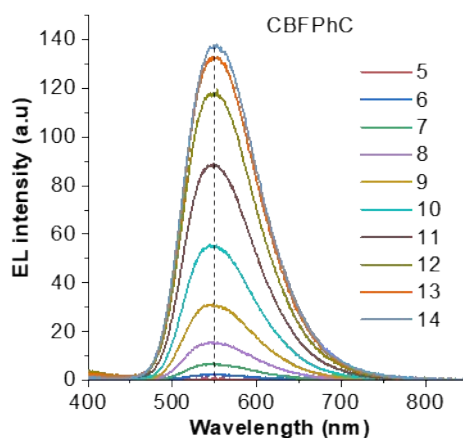

**Figure S1.** EL spectra at different applied voltages (CBFPhC)

**Figure S2.** Copies of NMR spectra (500 MHz for  $^1\text{H}$ , 151 MHz for  $^{13}\text{C}$  in  $\text{CDCl}_3$ ) and HRSM mass spectra  
**Compound 3**

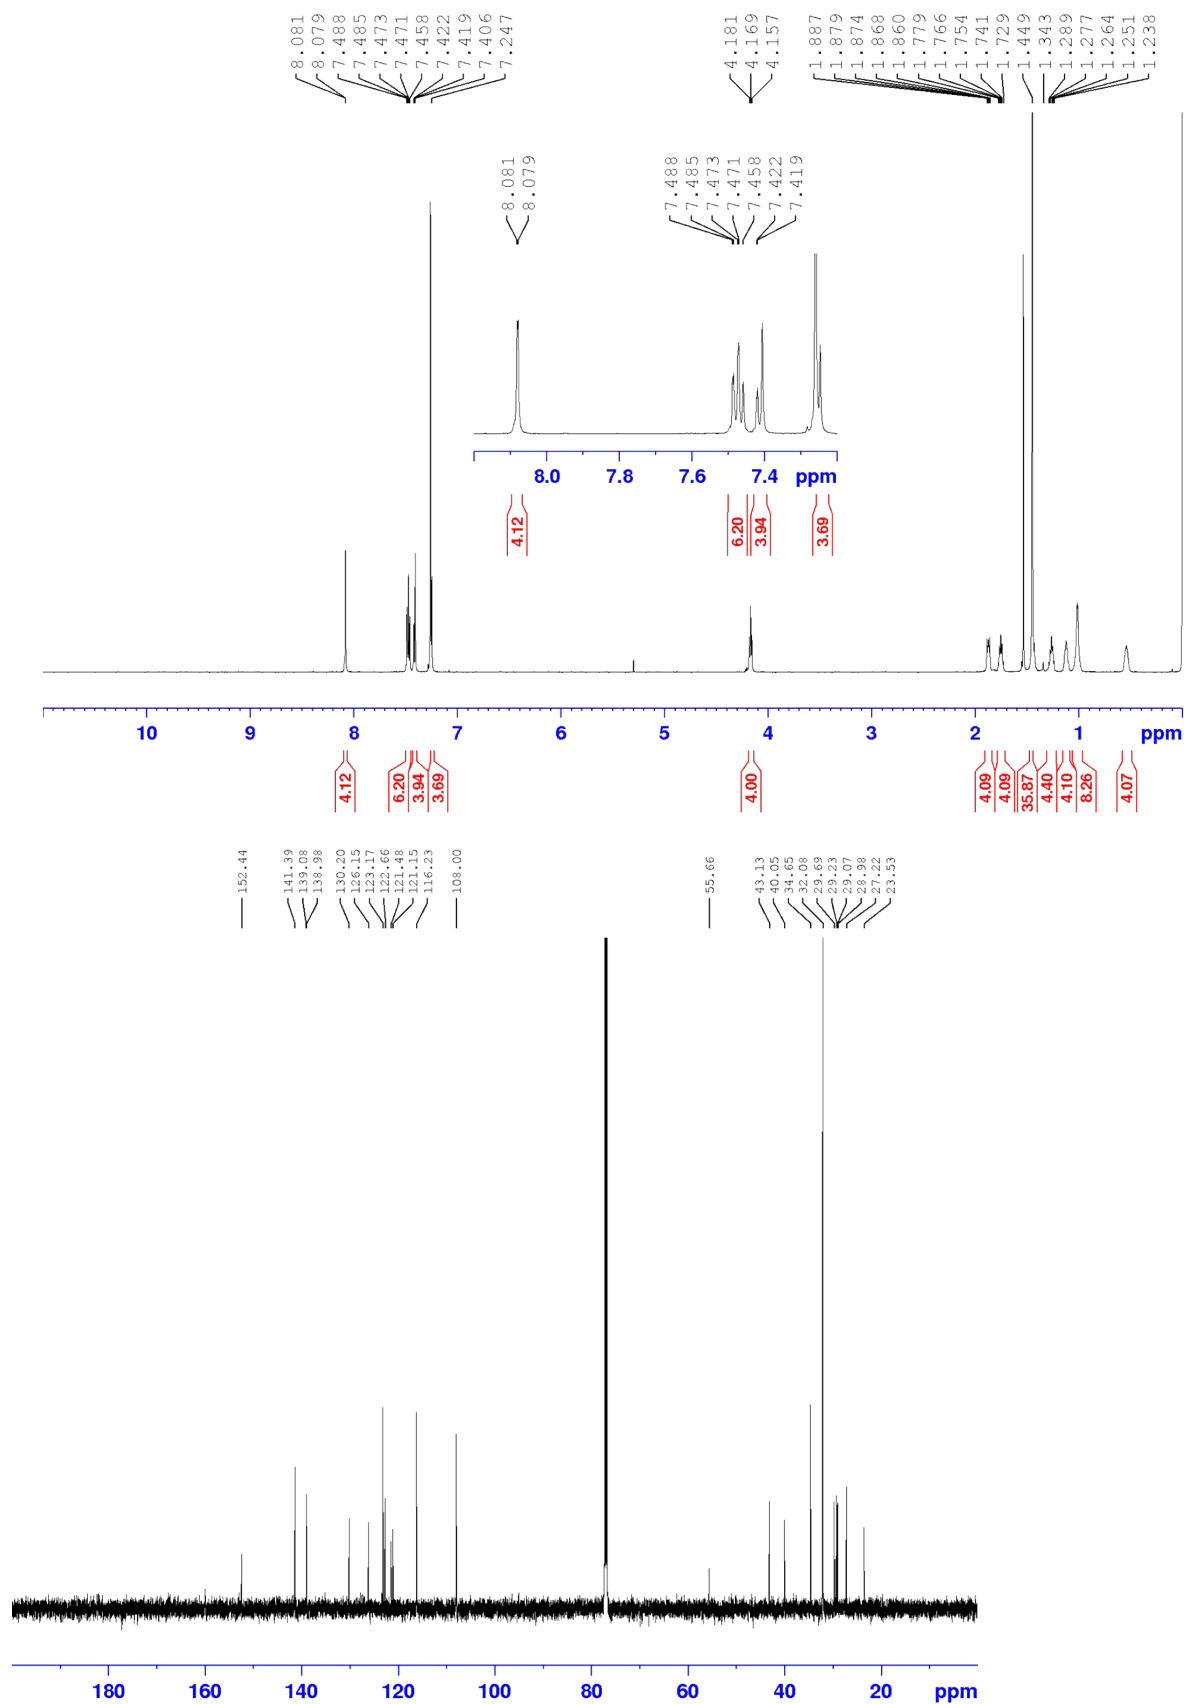

## Compound 4

AW04-20-1st-CC1-SP1  
CP\_PROTON8 CDC13 {D:\VISTEC NMR Data\VP} vpprw 8

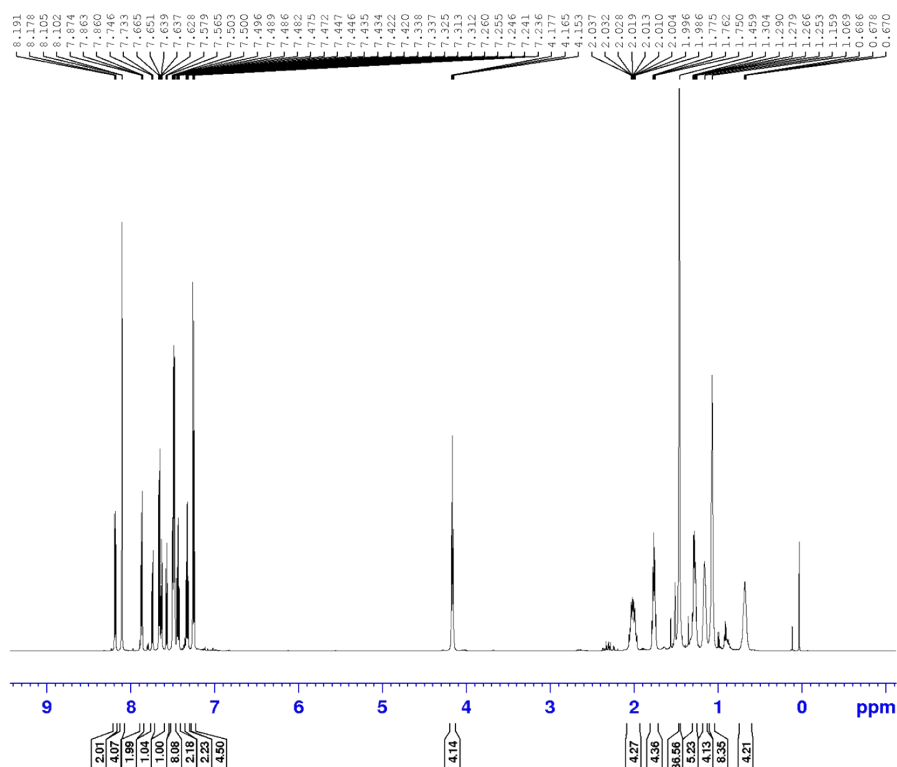

AW04-20-1st-CC1-SP1-256-best  
CP\_C13CPD CDC13 {D:\VISTEC NMR Data\VP} vpprw 8

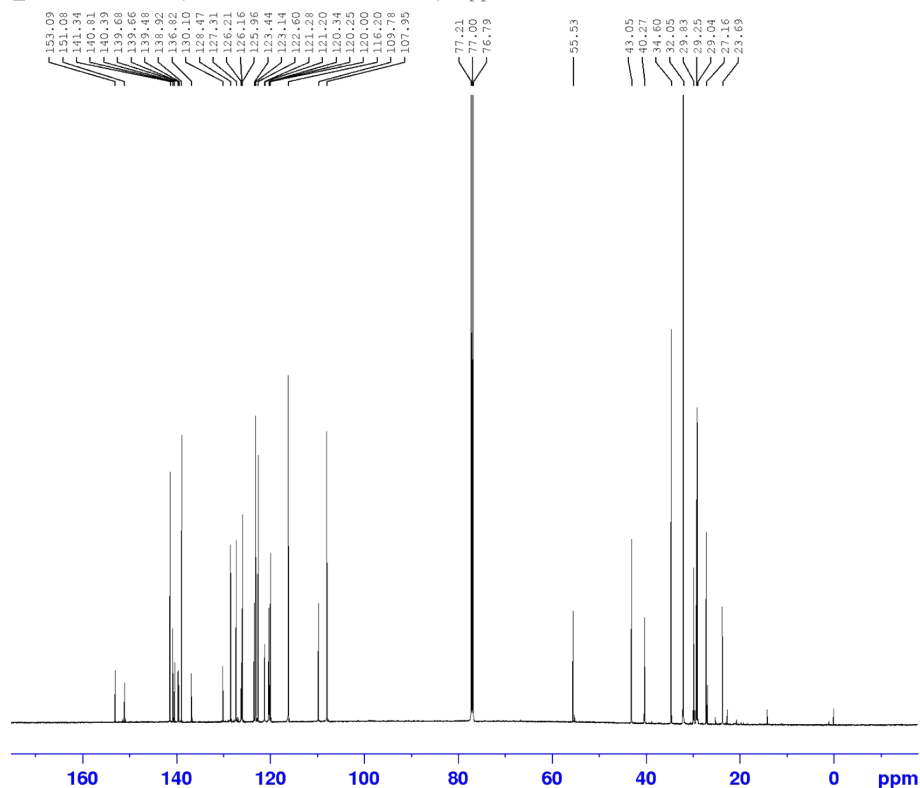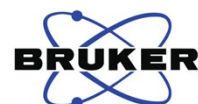

Current Data Parameters  
NAME AW04-20-1st-CC1-SP1  
EXPNO 1  
PROCNO 1

F2 - Acquisition Parameters  
Date\_ 20210222  
Time 18.10 h  
INSTRUM spect  
PROBHD Z115435\_0005 (   
PULPROG zg30  
TD 65536  
SOLVENT CDCl3  
NS 8  
DS 2  
SWH 12019.230 Hz  
FIDRES 0.366798 Hz  
AQ 2.7262976 sec  
RG 16.08  
DW 41.600 usec  
DE 40.00 usec  
TE 300.2 K  
D1 1.00000000 sec  
TD0 1  
SFO1 600.1337058 MHz  
NUC1 1H  
P0 3.90 usec  
P1 11.70 usec  
PLW1 18.20000076 W

F2 - Processing parameters  
SI 65536  
SF 600.1300282 MHz  
WDW EM  
SSB 0  
LB 0.30 Hz  
GB 0  
PC 1.00

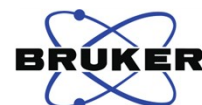

Current Data Parameters  
NAME AW04-20-1st-CC1-SP1  
EXPNO 2  
PROCNO 1

F2 - Acquisition Parameters  
Date\_ 20210222  
Time 18.23 h  
INSTRUM spect  
PROBHD Z115435\_0005 (   
PULPROG zgpg30  
TD 65536  
SOLVENT CDCl3  
NS 256  
DS 2  
SWH 36231.883 Hz  
FIDRES 1.105709 Hz  
AQ 0.9043968 sec  
RG 191.96  
DW 13.800 usec  
DE 18.00 usec  
TE 300.2 K  
D1 2.00000000 sec  
D11 0.03000000 sec  
TD0 1  
SFO1 150.9178988 MHz  
NUC1 13C  
P0 3.83 usec  
P1 11.50 usec  
PLW1 28.00000000 W  
SFO2 600.1324005 MHz  
NUC2 1H  
CPDPRG2 waltz16  
PCPD2 70.00 usec  
PLW2 18.20000076 W  
PLW12 0.50844997 W  
PLW13 0.25575000 W

F2 - Processing parameters  
SI 32768  
SF 150.9028201 MHz  
WDW EM  
SSB 0  
LB 1.00 Hz  
GB 0  
PC 1.40

# Compound 5

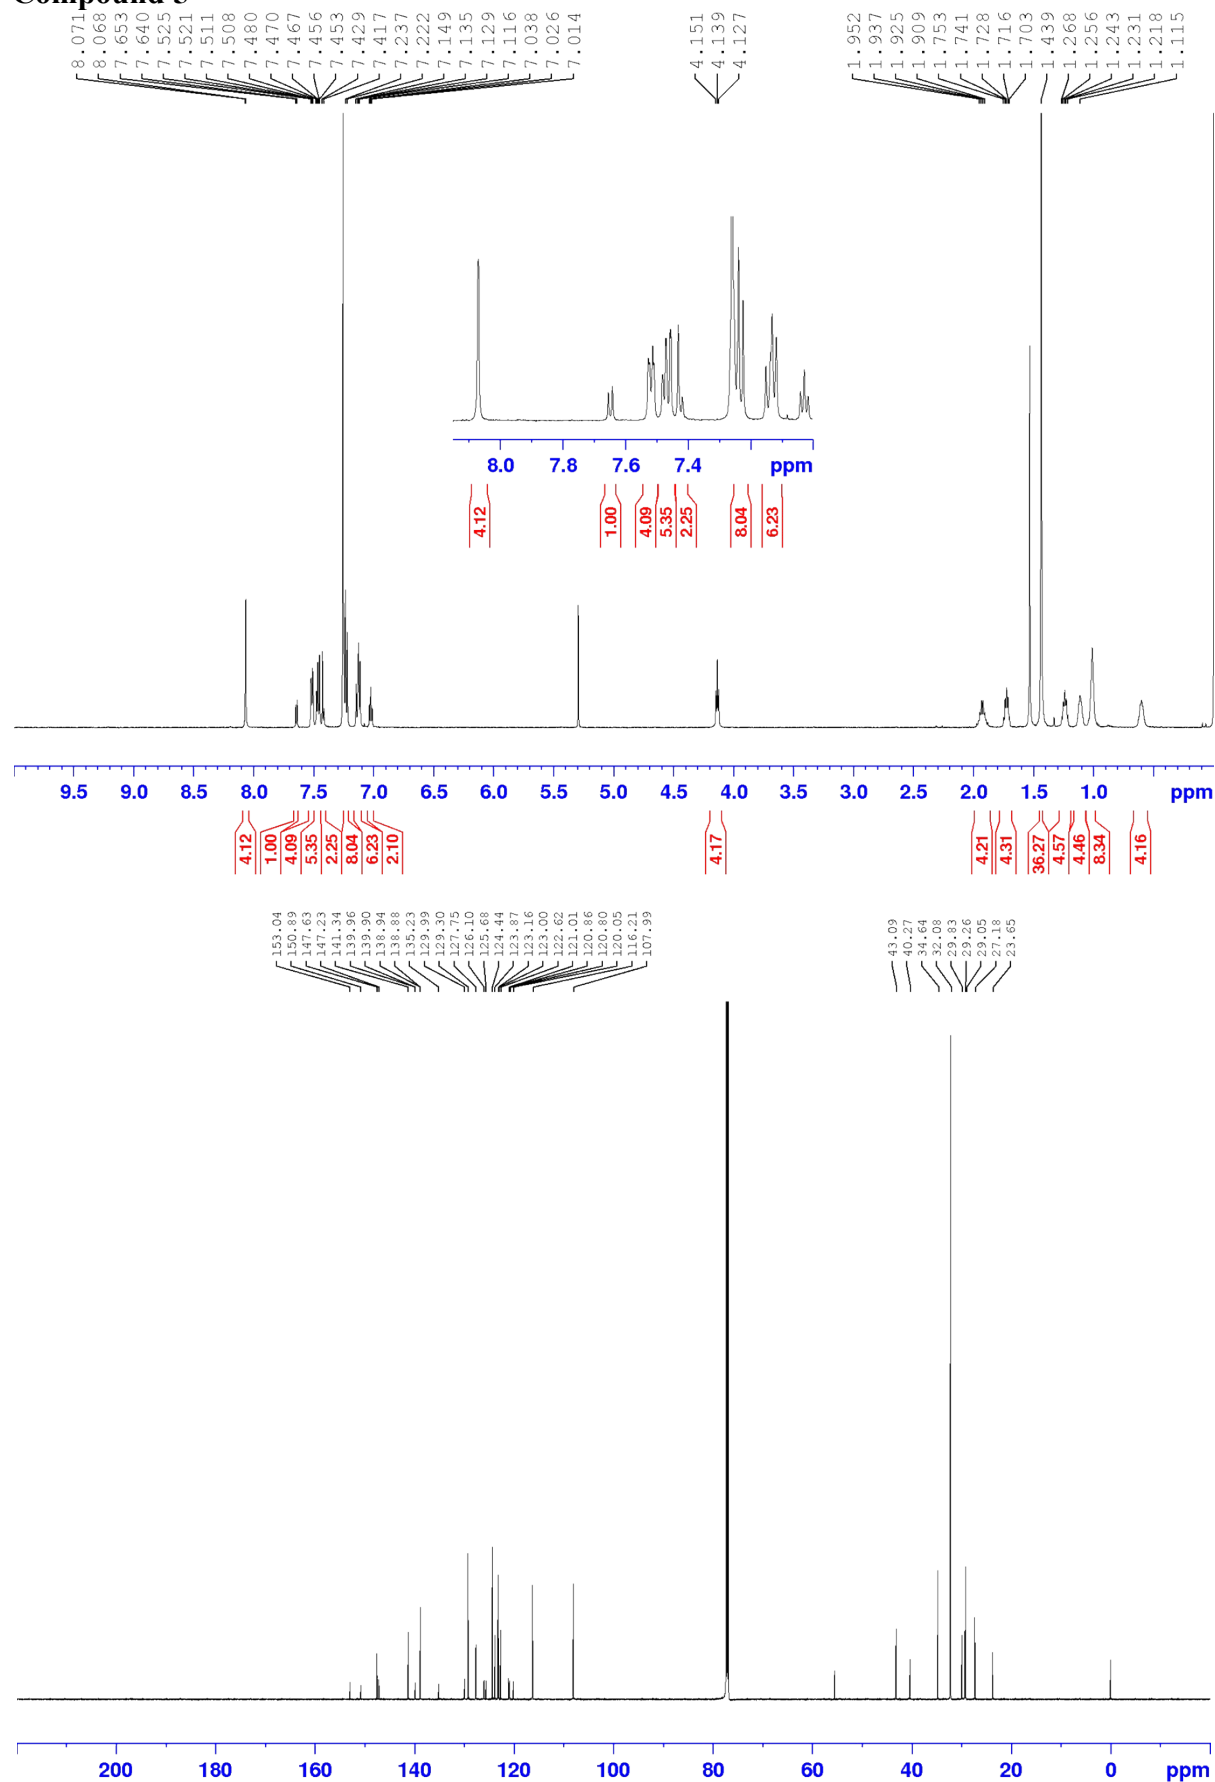

# Compound 7

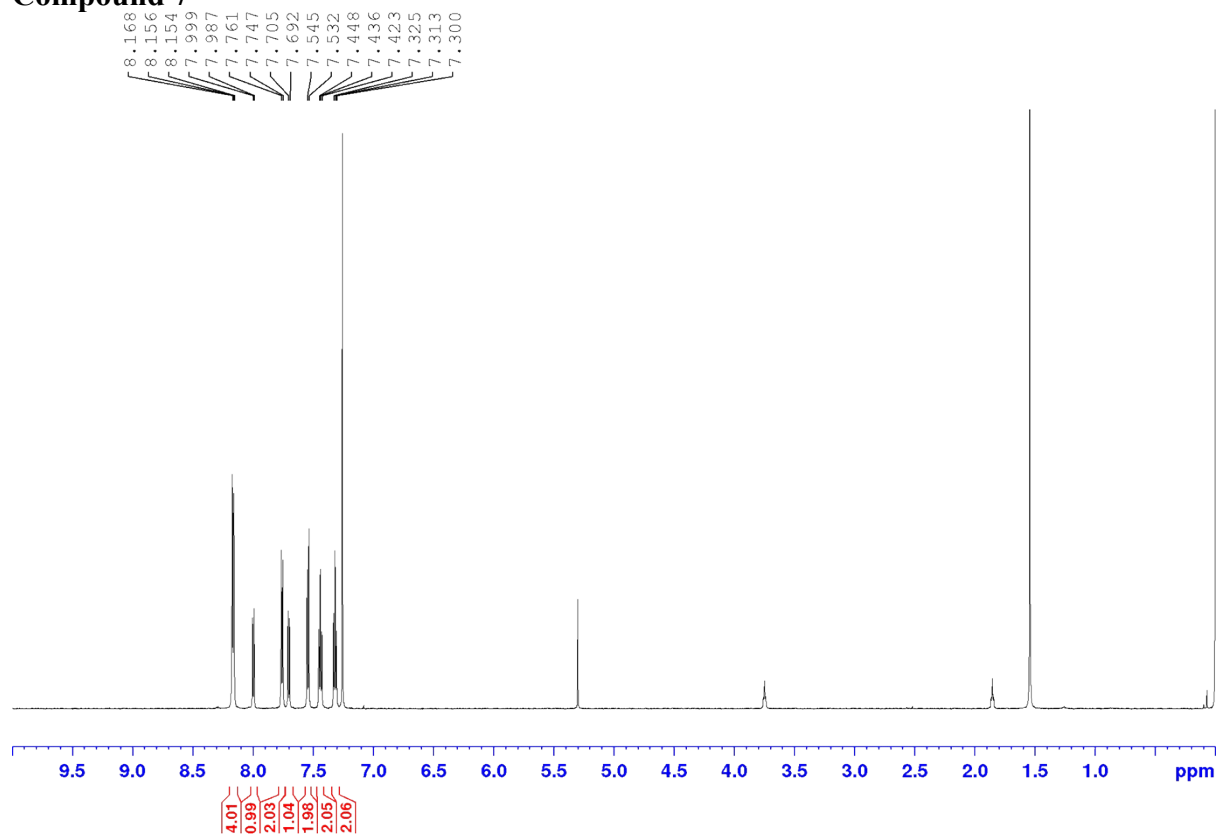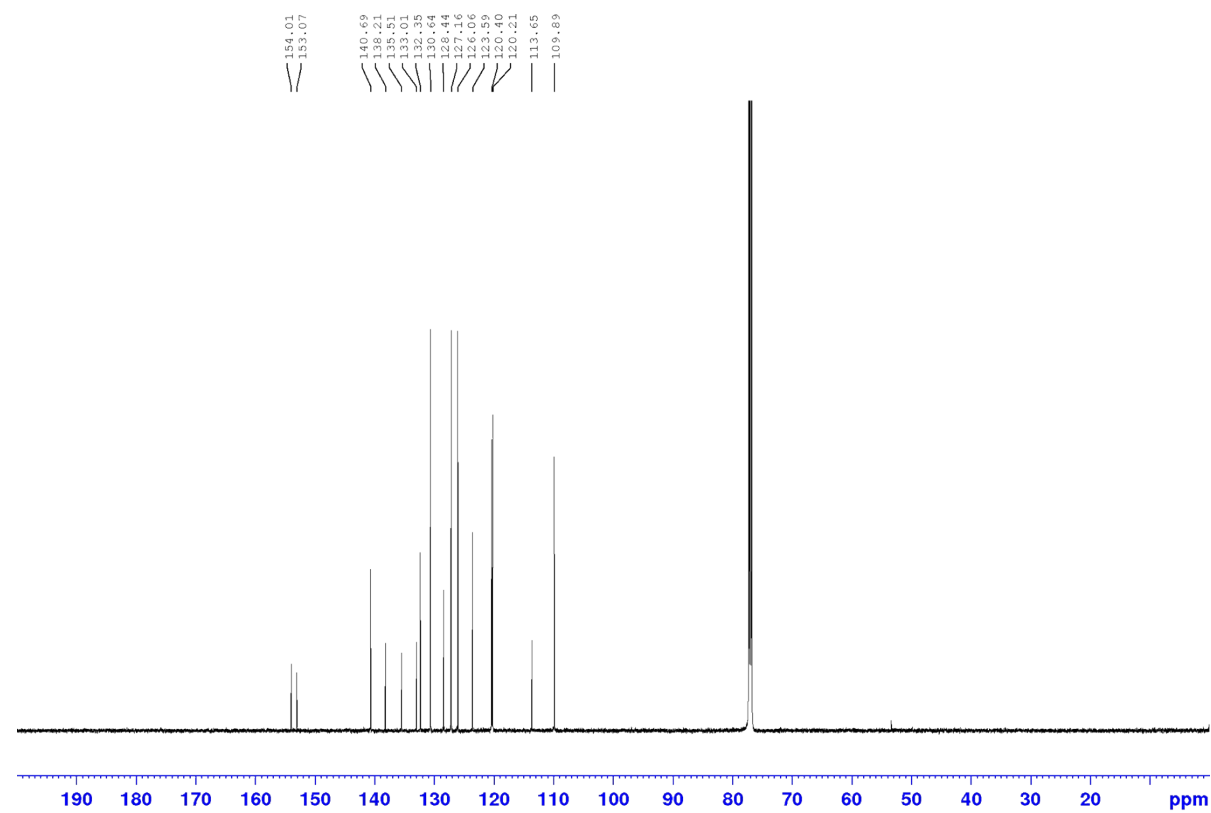

# Compound 8

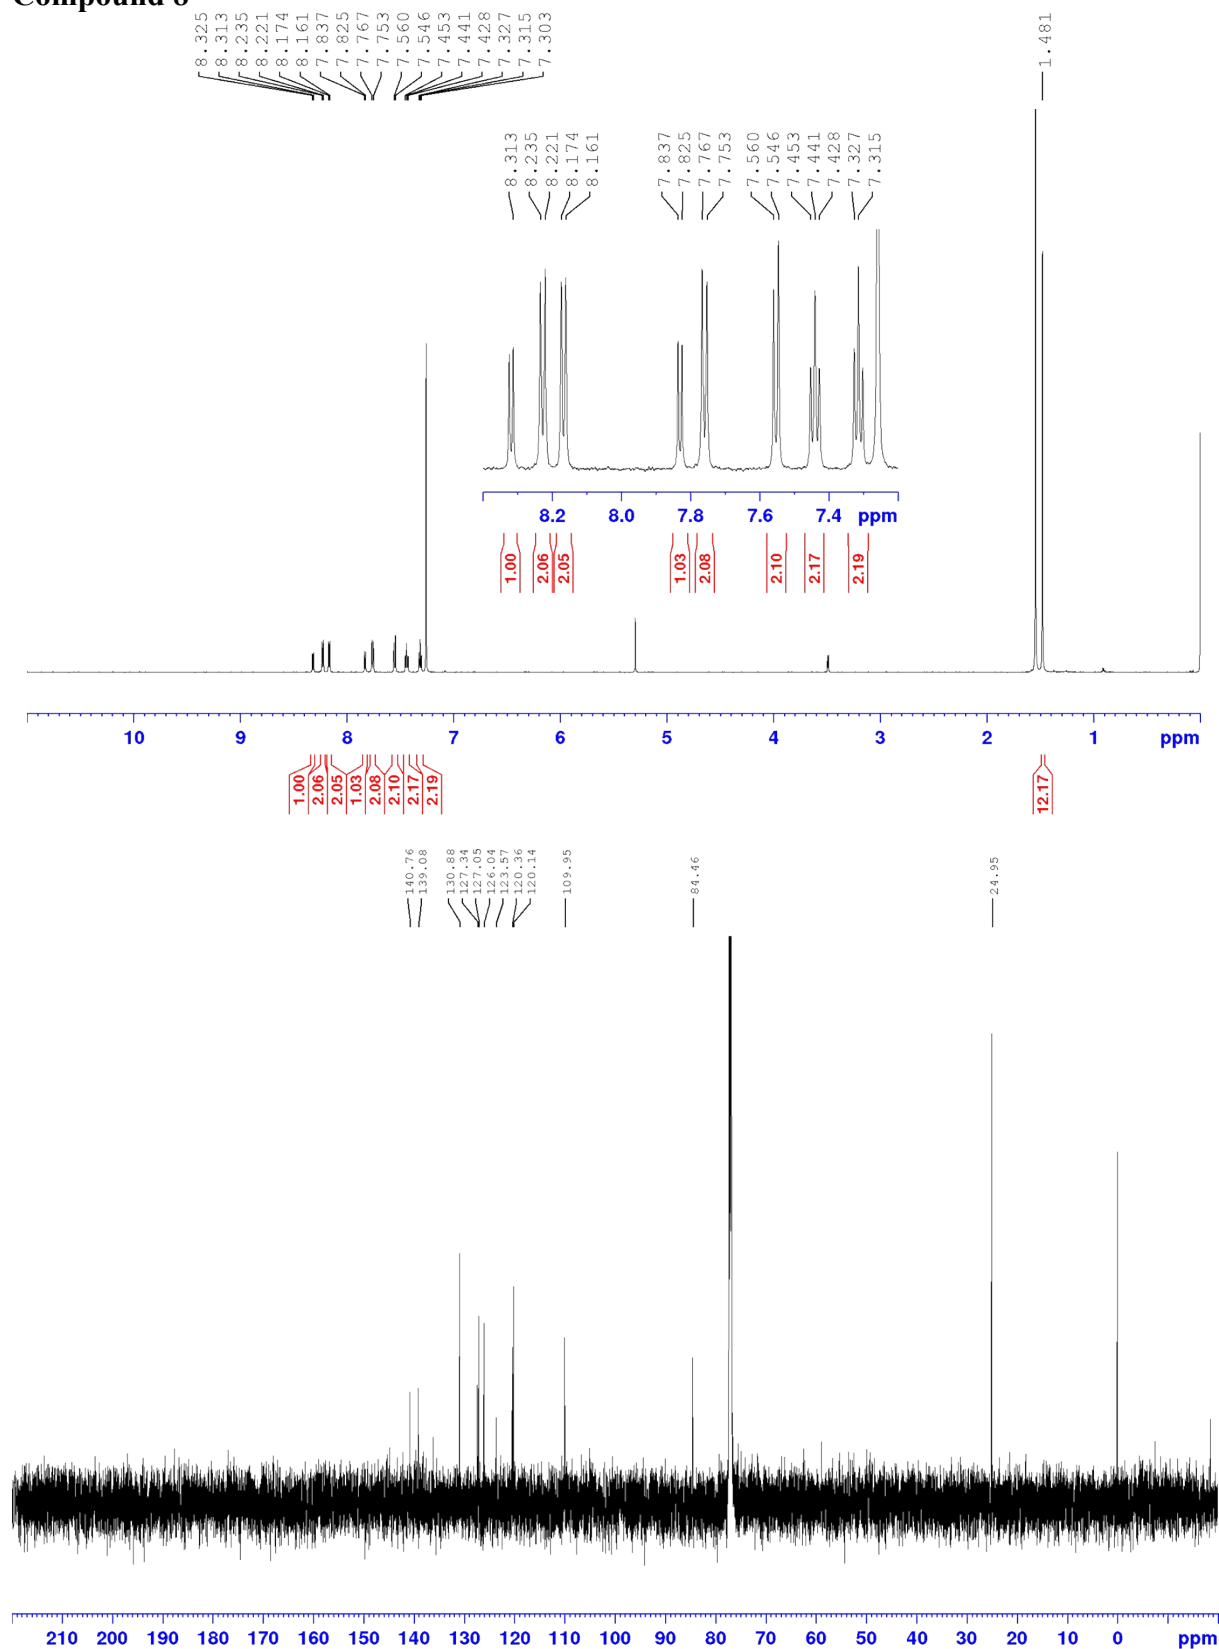

# Compound CBFPhC

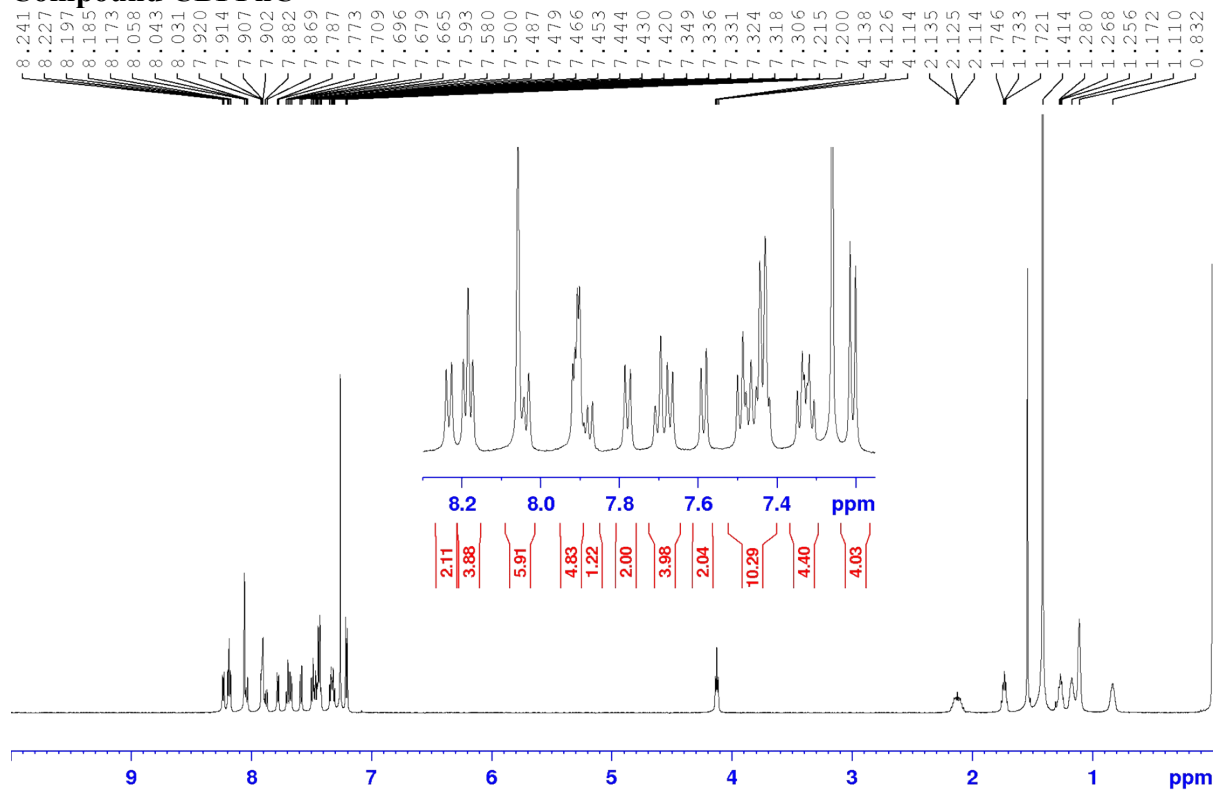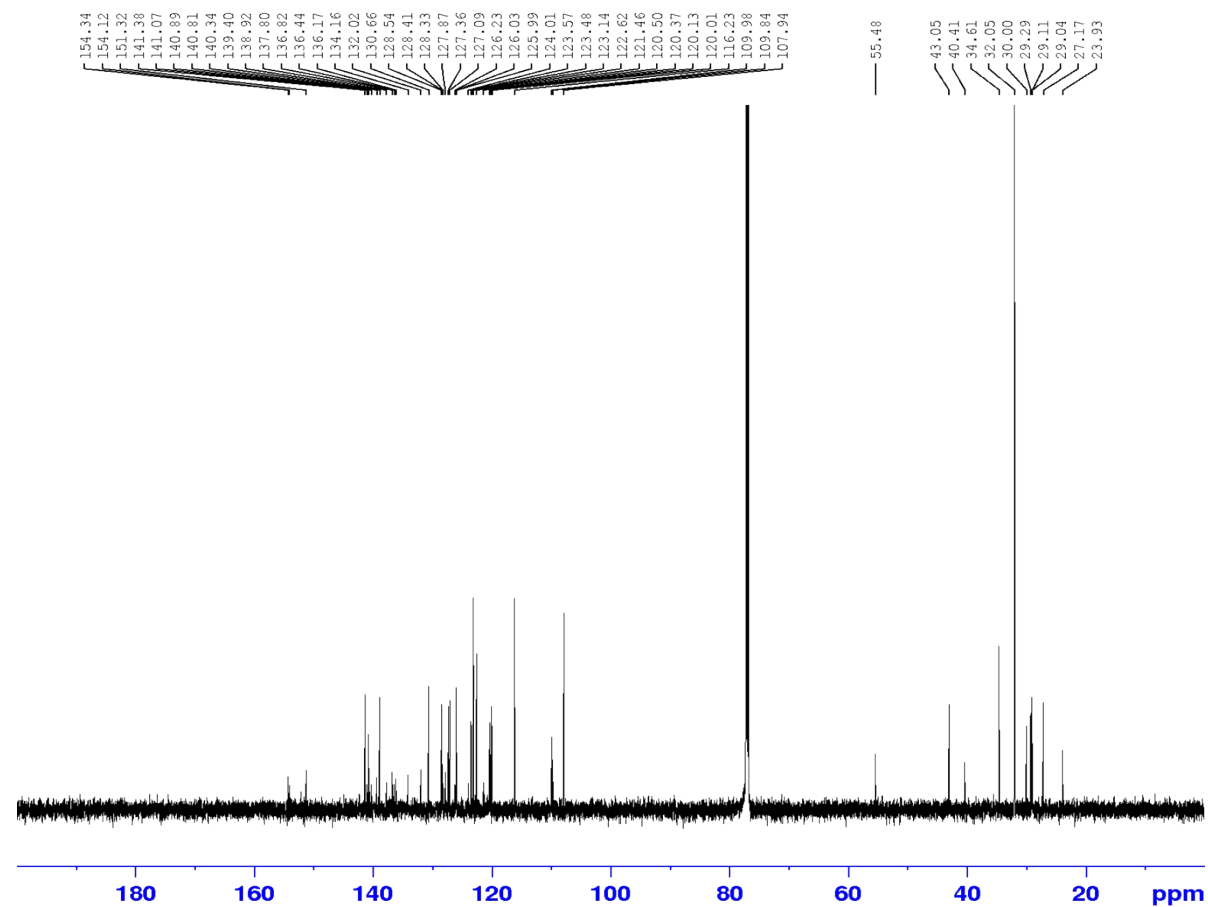

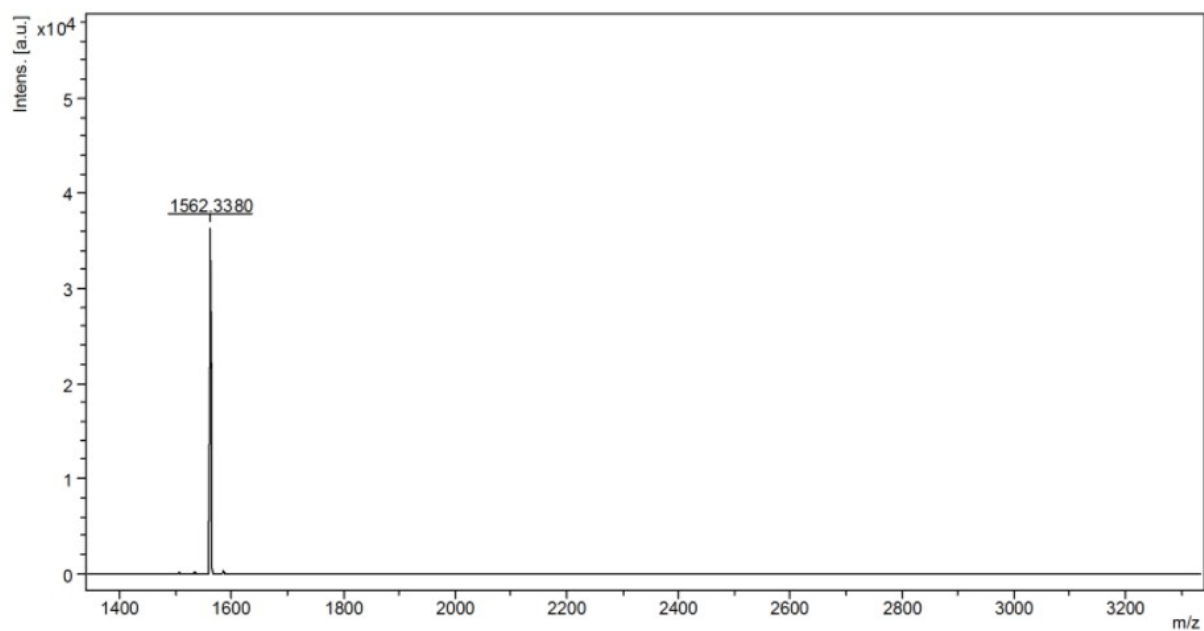

# Compound CBFTP A

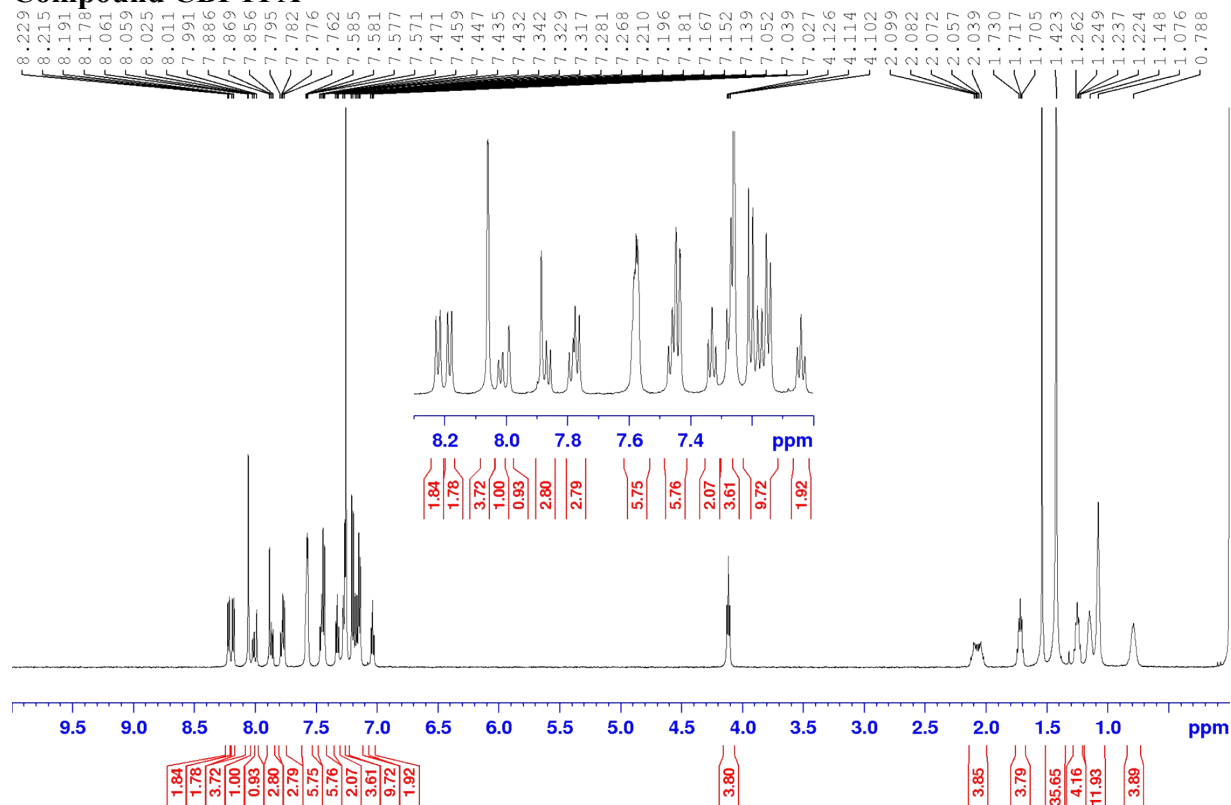



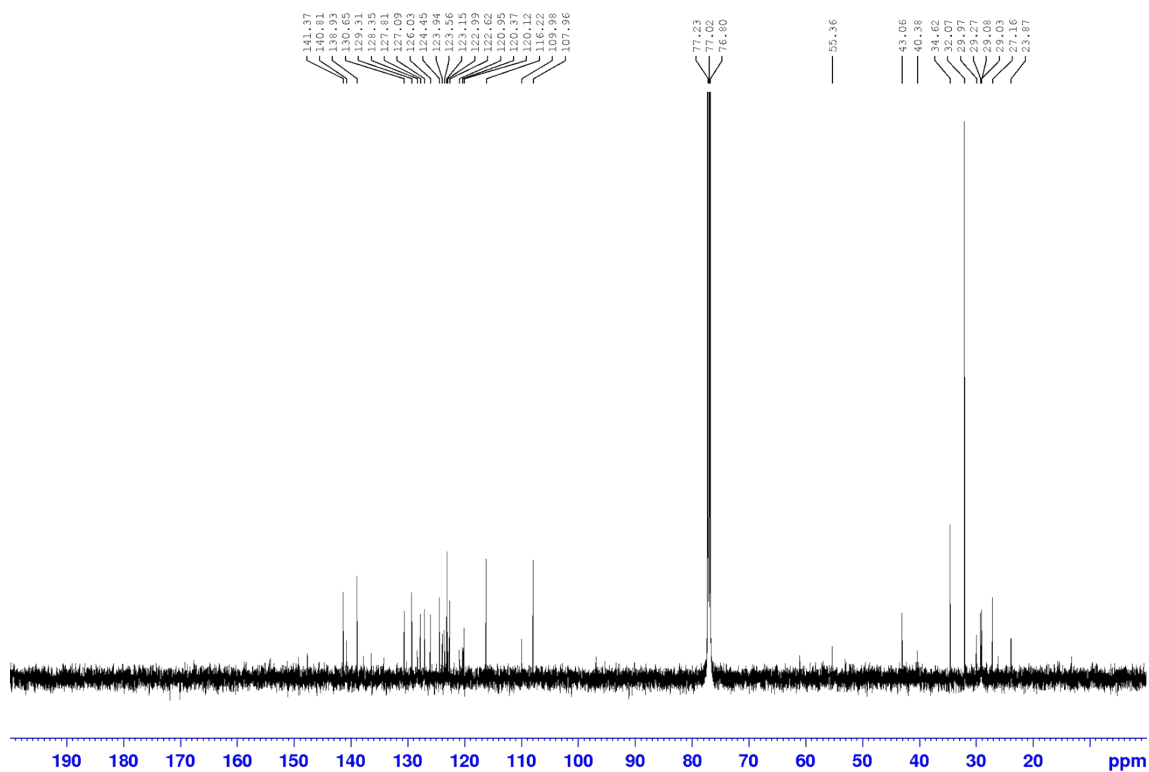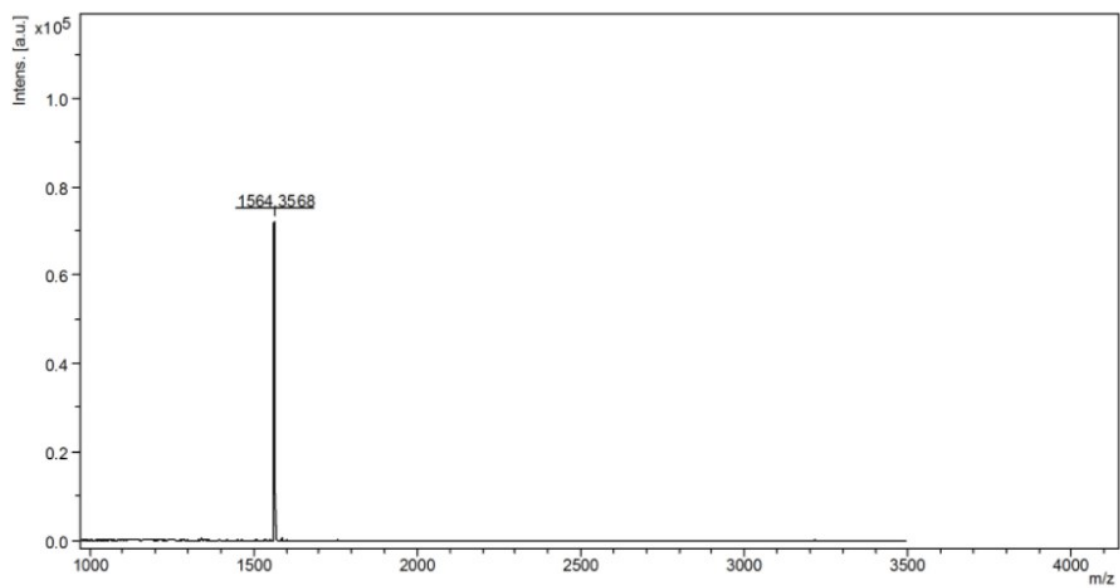

Supplement: d2nj04354h1.pdf [file d2nj04354h1.pdf]
